# Supplementary material for: Fluorescence resonance-energy-transfer in systems of Rhodamine 6G with ionic liquid showing emissions by excitation at wide wavelength areas
Source: Royal Society of Chemistry journal article supplement (doi:10.1039/c0cc01066a), 2010-01-01
Supplement: c0cc01066a.pdf [file c0cc01066a.pdf]

## **Electronic Supplementary Information**

### **Fluorescence resonance-energy-transfer in systems of Rhodamine 6G with ionic liquid showing emissions by excitation at wide wavelength area**

Hironori Izawa, Satoshi Wakizono and Jun-ichi Kadokawa

#### **Materials and Measurements**

Rhodamine 6G, BMIMCl, and GG were purchased from Tokyo Chemical Industry, Co., Ltd., Sigma-Aldrich Co., and Wako Pure Chemical Industries, Ltd., respectively. The GG/BMIMCl gel was prepared according to the literature procedure.<sup>[11]</sup> UV-Vis spectra were recorded on a Jasco V-650Q1. Fluorescence spectra were recorded on a Jasco FP-6300Q3.

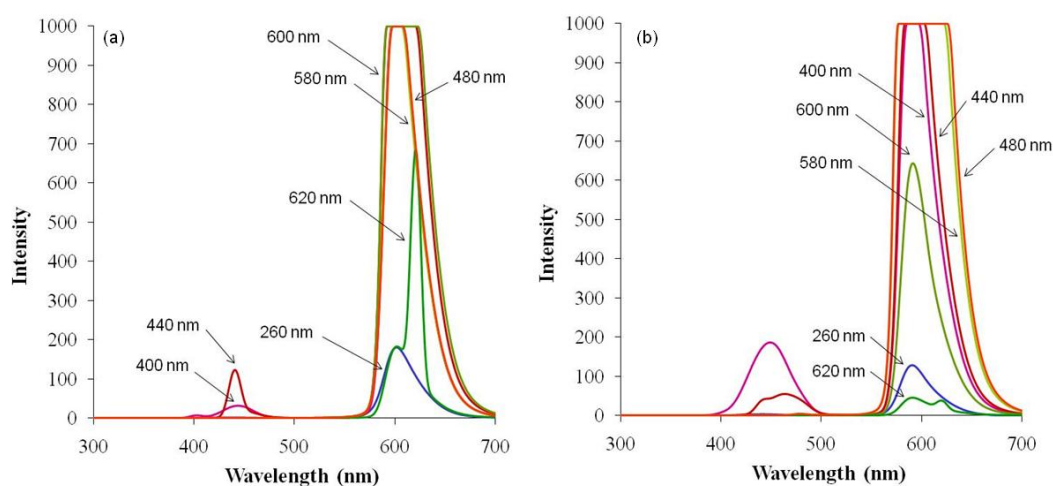

**Figure S1.** Fluorescence spectra of (a) 1.0 mmol/L and (b) 0.25 mmol/L Rhodamine 6G/BMIMCl solutions excited at 260 - 620 nm.

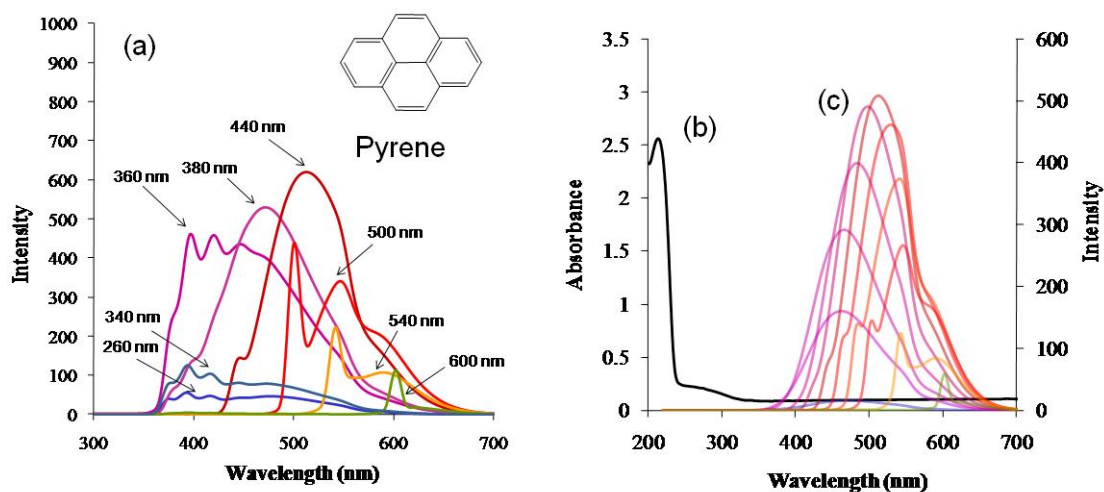

**Fig. S2.** a) Fluorescence spectra of 1.2 mmol/L pyrene/BMIMCl solution excited at 260-600 nm, b) UV-Vis spectrum of 1.2 mmol/L pyrene/BMIMCl solution, and c) fluorescence spectra of a sole BMIMCl.

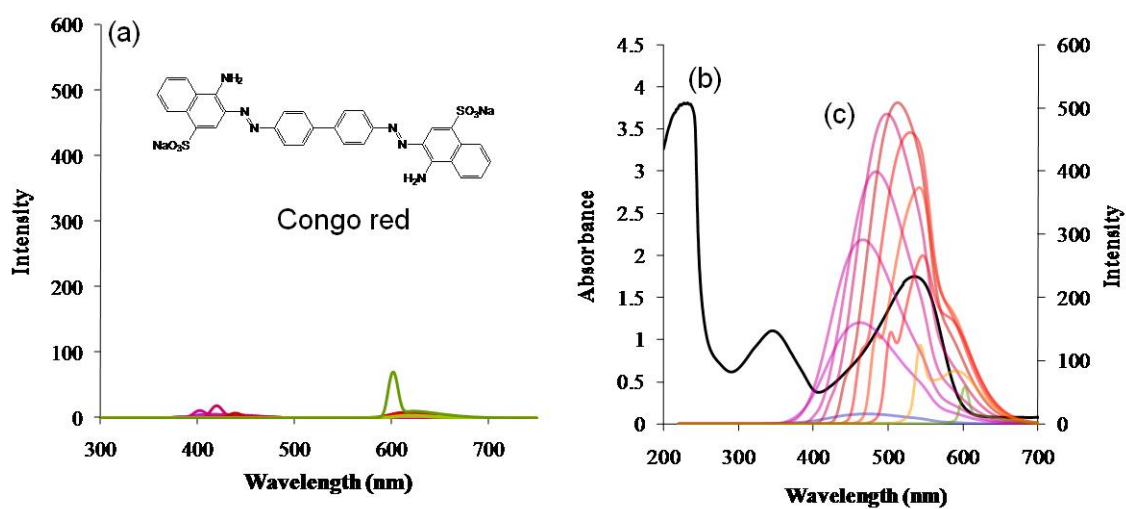

**Fig. S3.** Fluorescence spectra of 0.2 mmol/L Congo red/BMIMCl solution excited at 260-600 nm, b) UV-Vis spectrum of 0.2 mmol/L Congo red/BMIMCl solution, and c) fluorescence spectra of a sole BMIMCl.
